# Supplementary material
Source: Springer Nature journal article supplement (https://www.springermedizin.de/resource/supplementary/12968_2012_2643_MOESM1_ESM.pdf/9582390)

**TI-method**

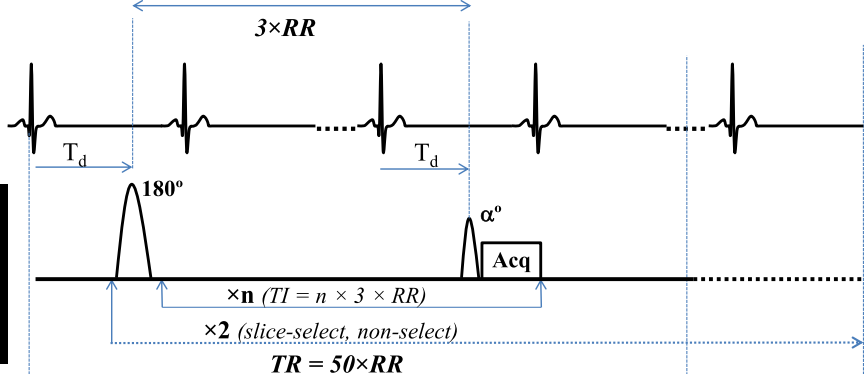

**SI-method**

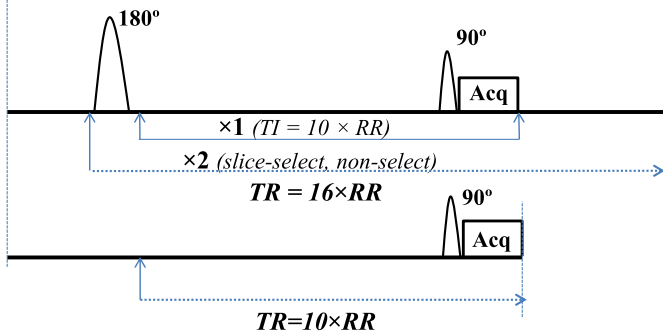

Supplement: MOESM1 [file 9582390]
